# Supplementary material for: Smartphone-assisted Hepatitis C detection assay based on magnetic levitation
Source: Royal Society of Chemistry journal article supplement (doi:10.1039/d0an01111h), 2020-01-01
Supplement: d0an01111h1.pdf [file d0an01111h1.pdf]

## Supplementary Data

# Smartphone-assisted *Hepatitis C* detection assay based on Magnetic Levitation

Fatih ÖZEFE<sup>1</sup>, Ahu ARSLAN YILDIZ<sup>1\*</sup>

<sup>1</sup> Department of Bioengineering, Izmir Institute of Technology (IZTECH), 35430, Izmir, Turkey

Corresponding Author: [ahuarslan@iyte.edu.tr](mailto:ahuarslan@iyte.edu.tr); +90 (232) 750-7384

[fatihozefe@iyte.edu.tr](mailto:fatihozefe@iyte.edu.tr)

### Levitation Heights for DMBs (Polyethylene Beads) in Magnetic Levitation Platform

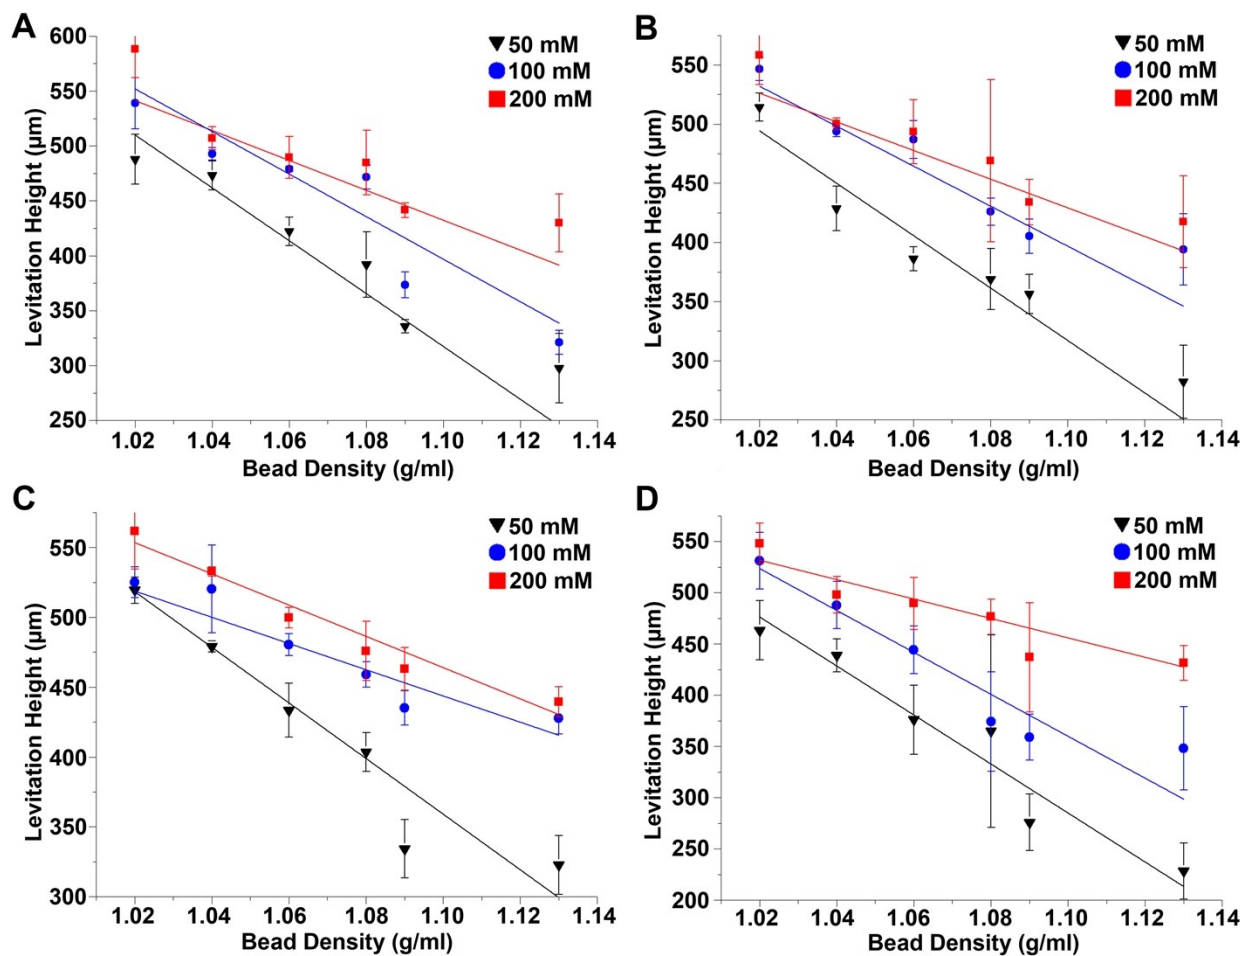

**Figure S1.** The levitation height of DMBs (with varied densities from 1.02 g/ml to 1.13 g/ml) was provided by different concentration levels (50, 100, and 200 mM) of (A) Gx; (B) Dx; (C) Ox; and (D) GdCl<sub>3</sub> within magnetic levitation platform.

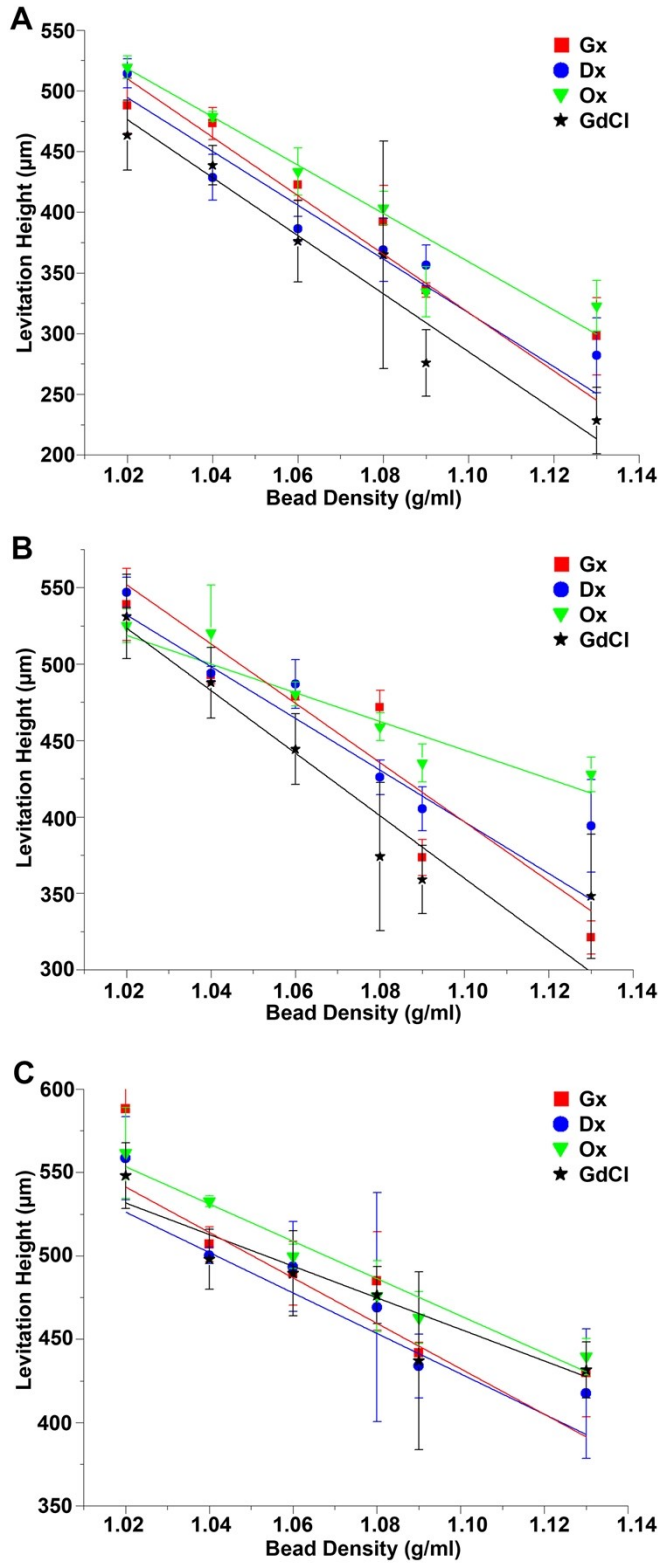

**Figure 2.** The levitation height of DMBs (with varied densities from 1.02 g/ml to 1.13 g/ml) was provided by using varied paramagnetic agents (Gx, Dx, Ox, and GdCl<sub>3</sub>) in (A) 50 mM; (B) 100 mM; and (C) 200 mM.
